# Supplementary material for: Surface Plasmon Resonance Assay for Label-Free and Selective Detection of HIV-1 p24 Protein
Source: MDPI journal article supplement (doi:10.3390/bios11060180), 2021-06-03
Supplement: s1 [file s1]

## Surface Plasmon Resonance assay for label-free and selective detection of HIV-1 p24 Protein

Lucia Sarcina <sup>1</sup>, Fabrizio Torricelli<sup>2</sup>, Paolo Bollella,<sup>1</sup> Zahara Gounani,<sup>3</sup> Ronald Österbacka,<sup>3</sup> Eleonora Macchia <sup>3,\*</sup> and Luisa Torsi<sup>1,3,4</sup>

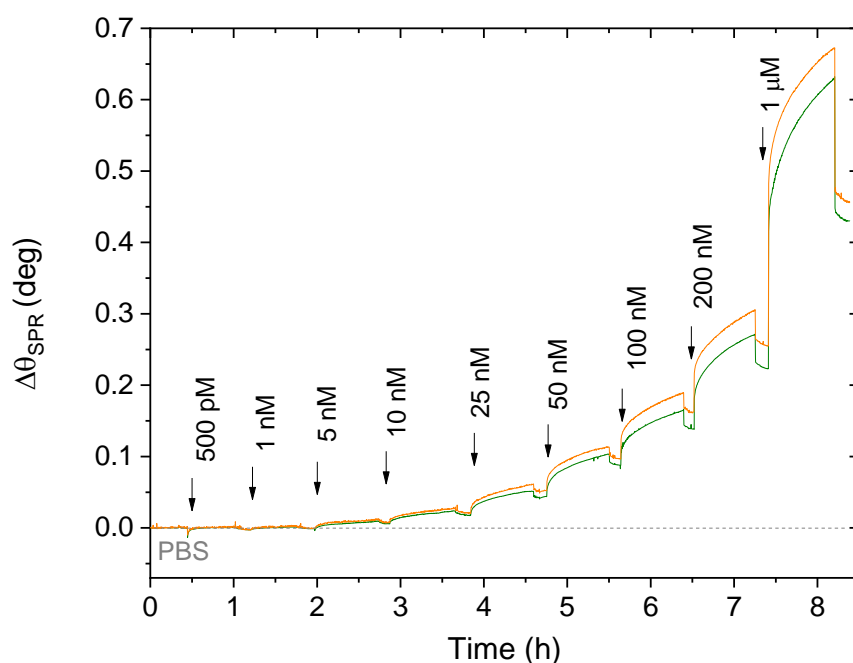

**Figure S1.** SPR sensogram recorded for the real-time exposure of the HIV-1 anti-p24 modified SAM to the target protein p24. The protein concentration ranged from 500 pM to 1  $\mu\text{M}$ . The baseline level was established in PBS.

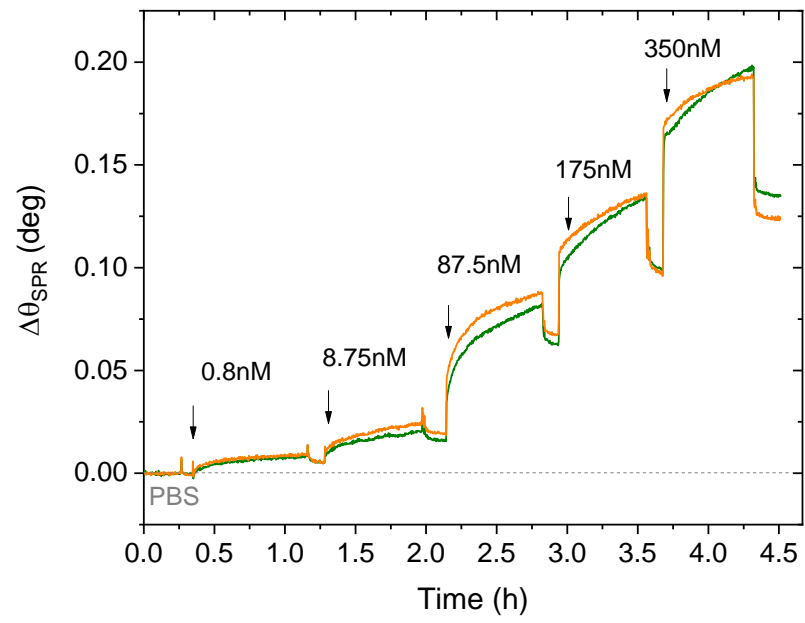

**Figure S2.** SPR sensogram of the assay of HIV-1 p24 protein at increasing concentrations (0.8 nM – 350 nM), performed on the physisorbed anti-p24 antibodies on gold.
